# Supplementary material for: Combined Effects of Nutrients × Water × Light on Metabolite Composition in Tomato Fruits (Solanum Lycopersicum L.)
Source: MDPI journal article supplement (doi:10.3390/plants10071437), 2021-07-14
Supplement: s1 [file s1]

**Table S1.** Chemical properties of soils before transplanting tomato plants. Mean values of three replicates.

| Nutrient condition | pH (1:5) | EC (dS/m) | NO <sub>3</sub> - N (mg/kg) | SOM (g/kg) | Av. P <sub>2</sub> O <sub>5</sub> (mg/kg) | Ex. Cations (cmol <sub>e</sub> /kg) |      |     |     |
|--------------------|----------|-----------|-----------------------------|------------|-------------------------------------------|-------------------------------------|------|-----|-----|
|                    |          |           |                             |            |                                           | K                                   | Ca   | Mg  | Na  |
| Low EC soil        | 6.3      | 0.8       | 75                          | 15         | 172                                       | 0.09                                | 2.9  | 0.6 | 0.2 |
| High EC soil       | 5.9      | 8.6       | 871                         | 32         | 791                                       | 1.69                                | 13.3 | 5.0 | 1.8 |

**Table S2.** Fertilizer applications for three different nutrient conditions

| Fertilizer application | Time                        | Fertilization for low EC soil (g/kg soil) |      |            |      | Fertilization for high EC soil (g/kg soil) |
|------------------------|-----------------------------|-------------------------------------------|------|------------|------|--------------------------------------------|
|                        |                             | Low N                                     |      | Standard N |      | High N                                     |
|                        |                             | N                                         | K    | N          | K    | K                                          |
| 1 <sup>st</sup> supply | 1.5 months after transplant | 0                                         | 0.14 | 0.05       | 0.14 | 0.05                                       |
| 2 <sup>nd</sup> supply | 2 months after transplant   | 0                                         | 0.14 | 0.05       | 0.14 | 0.05                                       |
| 3 <sup>rd</sup> supply | 3.5 months after transplant | 0                                         | 0.14 | 0.05       | 0.14 | 0.05                                       |

**Table S3. Differential primary metabolites identified by GC-TOF-MS in tomato fruits cultivated under varied lighting, nutrient, and water conditions**

| No.                                 | Ret (min) <sup>a</sup> | Metabolites <sup>b</sup>   | Unique Mass (m/z) | MS Fragment pattern (m/z)                 | ID <sup>c</sup> |
|-------------------------------------|------------------------|----------------------------|-------------------|-------------------------------------------|-----------------|
| <i>Amino acids</i>                  |                        |                            |                   |                                           |                 |
| 1                                   | 7.26                   | Isoleucine *               | 158               | 73, 57, 117, 130, 147, 158, 132, 219, 116 | STD/MS          |
| 2                                   | 7.39                   | Glycine                    | 174               | 73, 174, 86, 147, 107, 100, 133, 175, 118 | STD/MS          |
| 3                                   | 7.90                   | Serine                     | 204               | 73, 100, 204, 188, 147, 59, 218, 133      | STD/MS          |
| 4                                   | 8.14                   | Threonine                  | 219               | 73, 57, 117, 101, 147, 219, 218, 100      | STD/MS          |
| 5                                   | 8.48                   | β-Alanine *                | 248               | 73, 160, 130, 116, 174, 131, 161, 248     | STD/MS          |
| 6                                   | 9.28                   | Aspartic acid              | 232               | 73, 232, 100, 84, 147, 117, 218, 233, 133 | STD/MS          |
| 7                                   | 9.35                   | Pyroglutamic acid          | 156               | 73, 156, 174, 147, 157, 158, 230, 258     | STD/MS          |
| 8                                   | 9.36                   | GABA                       | 174               | 73, 174, 84, 147, 86, 175, 157, 100       | STD/MS          |
| 9                                   | 10.16                  | Phenylalanine              | 192               | 73, 218, 100, 192, 147, 84, 59, 219, 130  | STD/MS          |
| 10                                  | 14.14                  | Tryptophan                 | 202               | 73, 75, 117, 217, 202, 129, 130           | STD/MS          |
| <i>Organic acids</i>                |                        |                            |                   |                                           |                 |
| 11                                  | 7.43                   | Succinic acid *            | 247               | 73, 147, 107, 77, 55, 69, 84, 247, 256    | STD/MS          |
| 12                                  | 9.02                   | Malic acid                 | 233               | 73, 147, 133, 55, 101, 233, 148, 117      | STD/MS          |
| 13                                  | 11.61                  | Citric acid                | 273               | 73, 147, 273, 211, 149, 133, 129          | STD/MS          |
| <i>Sugars and sugar derivatives</i> |                        |                            |                   |                                           |                 |
| 14                                  | 7.07                   | Glycerol                   | 205               | 73, 147, 117, 103, 133, 205, 148, 218     | STD/MS          |
| 15                                  | 7.62                   | Glyceric acid *            | 189               | 73, 147, 189, 133, 103, 117, 130, 148     | STD/MS          |
| 16                                  | 10.42                  | Xylose                     | 103               | 73, 103, 217, 147, 133, 117, 307, 189     | STD/MS          |
| 17                                  | 10.94                  | Ribose *                   | 205               | 73, 117, 147, 89, 59, 133, 103, 205, 217  | STD/MS          |
| 18                                  | 12.10                  | Fructose                   | 103               | 73, 103, 217, 147, 307, 133, 218, 117     | STD/MS          |
| 19                                  | 12.28                  | Galactose                  | 160               | 73, 147, 160, 205, 103, 217, 319, 117     | STD/MS          |
| 20                                  | 12.37                  | Glucose                    | 103               | 73, 147, 103, 160, 205, 217, 319, 129     | STD/MS          |
| 21                                  | 12.53                  | Glucuronic acid *          | 333               | 73, 147, 103, 160, 217, 333, 133, 129     | STD/MS          |
| 22                                  | 13.44                  | myo-Inositol *             | 217               | 73, 147, 217, 191, 103, 129, 133, 305     | STD/MS          |
| 23                                  | 14.82                  | Glucose 6-phosphate *      | 299               | 73, 147, 103, 299, 129, 387, 160, 217     | STD/MS          |
| 24                                  | 15.35                  | myo-Inositol phosphate *   | 299               | 73, 147, 217, 299, 318, 103, 315, 133     | MS              |
| 25                                  | 16.51                  | Sucrose                    | 361               | 73, 147, 103, 217, 129, 169, 361, 271     | STD/MS          |
| 26                                  | 17.03                  | Maltose                    | 361               | 73, 147, 103, 361, 217, 191, 129, 204     | STD/MS          |
| <i>Fatty acids and lipids</i>       |                        |                            |                   |                                           |                 |
| 27                                  | 12.97                  | Palmitic acid *            | 117               | 73, 147, 75, 117, 129, 133, 132, 313      | STD/MS          |
| 28                                  | 14.14                  | Stearic acid **            | 117               | 73, 75, 117, 103, 129, 217, 132, 341      | STD/MS          |
| 29                                  | 16.04                  | Monopalmitin               | 371               | 73, 147, 75, 57, 129, 103, 117, 133, 371  | STD/MS          |
| 30                                  | 16.98                  | Fatty acid derivatives **  | 129               | 73, 147, 57, 129, 117, 101, 133, 203, 399 | MS              |
| <i>Nucleosides and nucleotides</i>  |                        |                            |                   |                                           |                 |
| 31                                  | 7.11                   | Adenosine 5'-diphosphate * | 299               | 73, 299, 133, 193, 211, 300, 207, 191     | STD/MS          |
| 32                                  | 15.49                  | Uridine                    | 169               | 73, 217, 130, 174, 147, 169, 129, 259     | STD/MS          |
| 33                                  | 16.40                  | Adenosine                  | 230               | 73, 230, 236, 103, 147, 217, 245, 192     | STD/MS          |
| 34                                  | 17.09                  | Guanosine                  | 324               | 73, 217, 147, 324, 129, 245, 230, 169     | STD/MS          |

| <i>Others</i>   |       |                  |     |                                           |                |
|-----------------|-------|------------------|-----|-------------------------------------------|----------------|
| 35              | 5.41  | Hydroxylamine ** | 146 | 73, 133, 146, 119, 59, 86, 147, 130, 100  | STD/MS         |
| 36              | 11.92 | Quinic acid      | 345 | 73, 147, 345, 255, 103, 133, 191, 148     | STD/MS         |
| <i>Unknowns</i> |       |                  |     |                                           |                |
| 37              | 6.46  | N.I. 1 **        | 228 | 73, 69, 58, 110, 77, 228, 134, 184, 127   | — <sup>d</sup> |
| 38              | 6.92  | N.I. 2 *         | 116 | 73, 116, 132, 75, 57, 74, 103, 117, 147   | —              |
| 39              | 8.45  | N.I. 3           | 160 | 73, 75, 160, 130, 117, 147, 100, 161, 131 | —              |
| 40              | 9.24  | N.I. 4 **        | 83  | 84, 73, 158, 85, 157, 186, 140, 116, 61   | —              |
| 41              | 9.55  | N.I. 5 **        | 120 | 120, 73, 75, 84, 146, 130, 103, 174       | —              |
| 42              | 11.84 | N.I. 6 *         | 173 | 73, 55, 173, 157, 147, 129, 174, 316      | —              |
| 43              | 15.67 | N.I. 7 **        | 103 | 73, 103, 147, 217, 68, 117, 129, 446      | —              |
| 44              | 15.81 | N.I. 8           | 446 | 73, 103, 147, 156, 68, 217, 117, 446      | —              |

<sup>a</sup> Retention time.; <sup>b</sup> Primary metabolites selected by VIP value (> 1.0) based on PLS-DA model.; <sup>c</sup> Identification. STD/MS, comparing with standard compounds analyzed under same condition and mass spectrum comparison with HMDB, NIST, and wiley 9 database.; <sup>d</sup> not detected.; \* Only selected metabolites in standard and low N soil condition; \*\* Only selected metabolites in high N soil condition.

Table S4. Differential secondary metabolites identified by UHPLC-LTQ-Orbitrap-MS in tomato fruits cultivated under varied lighting, nutrient, and water conditions

| No.                         | Ret (min) | Tentative Identification <sup>a</sup> | Identified ion ( <i>m/z</i> ) |                        | MS <sup>n</sup> fragment pattern ( <i>m/z</i> ) <sup>b</sup> | Elemental composition | Delta ppm | Reference          |
|-----------------------------|-----------|---------------------------------------|-------------------------------|------------------------|--------------------------------------------------------------|-----------------------|-----------|--------------------|
|                             |           |                                       | [M+H] <sup>+</sup>            | [M-H] <sup>-</sup>     |                                                              |                       |           |                    |
| <i>Phenylpropanoids</i>     |           |                                       |                               |                        |                                                              |                       |           |                    |
| 1                           | 2.09      | Caffeic acid glucose *                | —                             | 341.0904               | 341> 281, 179> 135                                           | C15H17O9 (–)          | 7.490     | REF [24]           |
| 2                           | 3.66      | Chlologenic acid                      | 355.1014                      | 353.0921               | 353> 191, 179, 173, 135                                      | C16H17O9 (–)          | -2.756    | REF [22]           |
| 3                           | 3.78      | Quercetin rutinoside hexoside         | 773.2116                      | 771.2064               | 771> 609, 463> 301> 271, 255, 179                            | C33H39O21 (–)         | -2.683    | REF [22]           |
| 4                           | 3.84      | Guaiacol hexose pentose *             | 441.1354 <sup>c</sup>         | 463.1510 <sup>d</sup>  | 463> 417, 293> 275, 233, 191, 149                            | C18H26O11Na (+)       | -3.066    | REF [25]           |
| 5                           | 4.43      | Quercetin rutinoside pentoside **     | 743.2014                      | 741.1984               | 741> 609, 300> 271, 255                                      | C32H39O20 (+)         | -2.664    | REF [22]           |
| 6                           | 4.60      | Rutin                                 | 611.1593                      | 609.1555               | 609>301> 271, 255, 179, 151                                  | C27H31O16 (+)         | -2.227    | REF [22]           |
| 7                           | 4.84      | Kaempferol rutinoside *               | 595.1645                      | 593.1558               | 593> 525, 285> 257, 229, 163                                 | C27H31O15 (+)         | -2.111    | REF [22]           |
| 8                           | 5.36      | Tricaffeoylquinic acid *              | 679.2957                      | 677.3019               | 677> 353> 335, 191, 173                                      | C34H29O15 (–)         | -2.811    | REF [22]           |
| 9                           | 5.61      | Flavonoids derivatives                | 255.0641                      | 253.0568               | 253> 224, 209, 197> 165, 153, 139                            | C15H11O4 (+)          | -4.726    | LIB <sup>e</sup>   |
| 10                          | 6.15      | Naringenin *                          | 273.0752                      | 271.0635               | 271> 225, 177, 151> 107                                      | C15H13O5 (+)          | -1.831    | REF [S2]           |
| <i>Polyamines</i>           |           |                                       |                               |                        |                                                              |                       |           |                    |
| 11                          | 4.01      | Feruloylagmatine **                   | 307.1754                      | 305.1656               | (+) 307> 247, 230, 177, 145                                  | C15H23N4O3 (+)        | -3.311    | REF [23]           |
| 12                          | 5.51      | Coumaroyl tyramine **                 | 284.1272                      | 282.1155               | 282> 240, 177, 162, 145, 119                                 | C17H18NO3 (+)         | -3.238    | REF [23]           |
| 13                          | 6.63      | Grossamide                            | 625.2519                      | 623.2587               | 623> 460> 297> 282, 175                                      | C36H37N2O8 (+)        | -4.082    | WebDB <sup>f</sup> |
| <i>Alkaloids</i>            |           |                                       |                               |                        |                                                              |                       |           |                    |
| 14                          | 4.31      | Esculeoside B                         | 1228.5942                     | 1272.6053 <sup>e</sup> | 1272> 1226> 1094, 932, 770, 608                              | C56H94NO28 (+)        | -1.178    | REF [24]           |
| 15                          | 4.77      | Esculeoside A                         | 1270.6033                     | 1268.6061              | 1268> 1136, 974, 932> 752, 590                               | C58H96NO29 (+)        | -2.347    | REF [22]           |
| 16                          | 4.83      | Lycoperoside H or Hydroxytomatine     | 1050.5461                     | 1094.5671 <sup>e</sup> | — <sup>h</sup>                                               | C50H84NO22 (+)        | -1.722    | REF [24]           |
| 17                          | 5.36      | Dehydrotomatine **                    | 1032.5355                     | 1076.5585 <sup>e</sup> | —                                                            | C50H82NO21 (+)        | -1.806    | REF [26]           |
| 18                          | 5.44      | Tomatine *                            | 1034.5493                     | 1078.5707 <sup>e</sup> | —                                                            | C50H84NO21 (+)        | -3.591    | REF [26]           |
| <i>Oxylipins and lipids</i> |           |                                       |                               |                        |                                                              |                       |           |                    |

|                        |      |                                 |                       |                       |                                   |                 |        |                   |
|------------------------|------|---------------------------------|-----------------------|-----------------------|-----------------------------------|-----------------|--------|-------------------|
| 19                     | 6.19 | 9,12,13-TriHODE *               | 351.2137 <sup>c</sup> | 327.2215              | 327> 309, 291, 229, 211, 171> 153 | C18H32O5Na (+)  | -1.467 | REF [22]          |
| 20                     | 7.85 | LysoPC(18:3) *                  | 518.3220              | 562.3192 <sup>d</sup> | 562> 502, 431> 277                | C26H49NO7P (+)  | -4.043 | REF [22]          |
| 21                     | 8.14 | LysoPE(18:2)                    | 478.2909              | 476.2819              | 476> 402, 384> 357                | C23H45NO7P (+)  | -3.441 | REF [22]          |
| 22                     | 8.14 | LysoPE(20:5)                    | 500.2732              | 544.2698 <sup>d</sup> | 544> 498, 476> 279                | C25H43NO7P (+)  | -8.007 | HMDB <sup>g</sup> |
| 23                     | 8.23 | LysoPC(18:2) *                  | 520.3379              | 564.3346 <sup>d</sup> | 564> 504, 391> 279, 242           | C26H51NO7P (+)  | -3.605 | REF [22]          |
| 24                     | 8.56 | LysoPE(16:0) *                  | 454.2913              | 452.2807              | 452> 391, 255> 237                | C21H45NO7P (+)  | -3.292 | REF [22]          |
| 25                     | 8.64 | LysoPC(16:0) *                  | 496.3377              | 540.3355 <sup>d</sup> | 540> 480, 391> 255, 224           | C24H51NO7P (+)  | -4.142 | REF [22]          |
| 26                     | 8.64 | Oxylin <sup>**</sup>            | 311.2205              | 309.1771              | 309> 291, 273, 185, 171, 155      | C18H31O4 (+)    | -3.843 | REF [27]          |
| 27                     | 8.72 | LysoPC(18:1) *                  | 522.3533              | 566.3500 <sup>d</sup> | 566> 506, 415> 281, 242           | C26H53NO7P (+)  | -3.993 | REF [23]          |
| 28                     | 8.86 | LysoPA(18:2) *                  | 435.2491              | 433.2386              | 433> 415, 365, 153> 97, 79        | C21H40O7P (+)   | -3.461 | REF [23]          |
| 29                     | 9.50 | LysoPC(18:0) *                  | 524.3684              | 568.3646 <sup>d</sup> | 568> 508, 421, 391> 283, 224      | C26H55NO7P (+)  | -5.065 | REF [23]          |
| <b><i>Others</i></b>   |      |                                 |                       |                       |                                   |                 |        |                   |
| 30                     | 3.80 | Benzyl alcohol hexose pentose * | 425.1406 <sup>c</sup> | 447.1559 <sup>d</sup> | 447> 401> 269, 233, 161           | C18H26O10Na (+) | -2.795 | REF [25]          |
| <b><i>Unknowns</i></b> |      |                                 |                       |                       |                                   |                 |        |                   |
| 31                     | 1.01 | N.I. 1                          | 328.1378              | 326.1264              | 326> 308, 278, 236, 206, 164      | –               | –      | –                 |
| 32                     | 3.99 | N.I. 2                          | 469.1666 <sup>c</sup> | 491.1823 <sup>d</sup> | 491> 445> 323, 221, 179           | –               | –      | –                 |
| 33                     | 4.03 | N.I. 3                          | 409.1822 <sup>c</sup> | 431.1957 <sup>d</sup> | 431> 385> 223, 205, 161, 153      | –               | –      | –                 |
| 34                     | 4.27 | N.I. 4                          | 439.1559 <sup>c</sup> | 461.1758 <sup>d</sup> | 461> 415, 311> 251, 191, 149      | –               | –      | –                 |
| 35                     | 6.99 | N.I. 5 <sup>**</sup>            | 449.1473              | 447.1385              | –                                 | –               | –      | –                 |

<sup>a</sup> Secondary metabolites selected by VIP value (> 1.0) based on PLS-DA model.; <sup>b</sup> MS<sup>n</sup> fragment patterns detected in negative ion mode.; <sup>c</sup> [M+Na]<sup>+</sup>; <sup>d</sup> [M+HCOOH-H]<sup>-</sup>; <sup>e</sup> In house library; <sup>f</sup> Web database (KNAPSAcK core system; [http://www.knapsackfamily.com/knapsack\\_core/top.php](http://www.knapsackfamily.com/knapsack_core/top.php)); <sup>g</sup> The Human Metabolome Database (HMDB; <https://hmdb.ca/>); <sup>h</sup> Not detected.; \* Only selected metabolites in standard and low N soil condition; \*\* Only selected metabolites in high N soil condition.

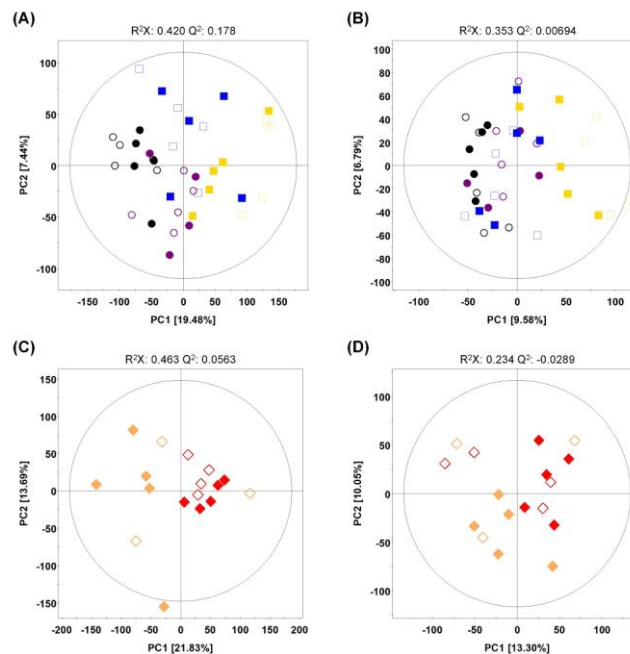

**Figure S1.** PCA score plots from GC-TOF-MS **(A)** and UHPLC-LTQ-Orbitrap-MS **(B)** analysis of tomato cultivated under different nutrient, water, and light condition. Symbol, SN-SW-OFF (■); SN-LW-OFF (□); LN-SW-OFF (●); LN-LW-OFF (○); SN-SW-ON (■); SN-LW-ON (□); LN-SW-ON (●); LN-LW-ON (○). SN, standard soil; SW, sufficient water; OFF, red light off; LN, Low-N; LW, limited water; ON, red light on. PCA score plots from GC-TOF-MS **(C)** and UHPLC-LTQ-Orbitrap-MS **(D)** analysis of tomato cultivated under water, and light condition for high N soil. Symbol, HN-SW-OFF (◆); HN-LW-OFF (◇); HN-SW-ON (◆); HN-LW-ON (◇). HN, high N soil; SW, sufficient water; OFF, red light off; LW, limited water; ON, red light on.
